# Supplementary material for: Chitosan-derived carbon supported CoO combined with CdS facilitates visible light catalytic hydrogen evolution
Source: Royal Society of Chemistry journal article supplement (doi:10.1039/d2cy01962k), 2023-01-01
Supplement: d2cy01962k1.pdf [file d2cy01962k1.pdf]

# Chitosan-derived carbon supported CoO combined with CdS facilitates visible light catalytic hydrogen evolution

Peijing Guo <sup>a</sup>, Shaoyu Yuan <sup>a</sup>, Bingrong Guo <sup>b</sup>, Siwei Li <sup>b\*</sup>, Yongjun Gao <sup>a\*</sup>

<sup>a</sup> College of Chemistry and Environmental Science, Hebei University, Baoding, 071002, China.

<sup>b</sup> Institute of Industrial Catalysis, School of Chemical Engineering and Technology, Xi'an Jiaotong University, Xi'an 710049, China.

\*Corresponding author, E-mail: yjgao@hbu.edu.cn (Yongjun Gao); lisiwei@xjtu.edu.cn (Siwei Li)

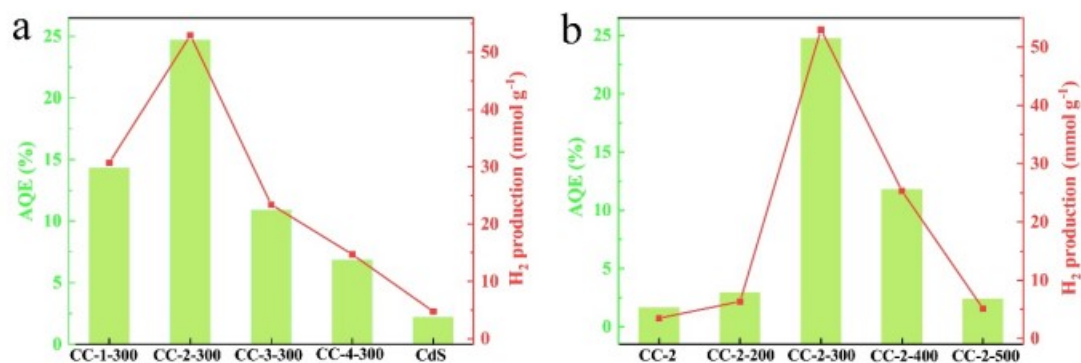

**Figure S1.** The quantum efficiency of different catalysts.

**Table S1.** Comparison between CC-2-300 and other reported catalysts on the visible-light photocatalytic hydrogen evolution reaction.

| Photocatalysts  | Photocatalyst dosage (mg) | Light source                                 | Sacrificial reagent & Reaction solvent                                              | Hydrogen evolution rate (mmol/g/h) | Refs.     |
|-----------------|---------------------------|----------------------------------------------|-------------------------------------------------------------------------------------|------------------------------------|-----------|
| CC-2-300        | 10                        | 300 W Xe lamp<br>$\lambda \geq 420\text{nm}$ | 20 vol% LA,<br>Water (40 mL)                                                        | 10.60                              | This work |
| CdS/NiAl<br>LDH | 10                        | 5 W LED white<br>light                       | 0.25 M $\text{Na}_2\text{SO}_3$<br>+0.35 M $\text{Na}_2\text{S}$ ,<br>Water (30 mL) | 7.09                               | [1]       |
| CoPx/CdS<br>NRs | 10                        | 300 W Xe lamp<br>$\lambda > 420\text{nm}$    | 1.5 M $\text{Na}_2\text{SO}_3$<br>+2.1 M $\text{Na}_2\text{S}$ ,<br>Water (20 mL)   | 0.50                               | [2]       |
| NMS/SCN         | 50                        | 300 W Xe lamp<br>$\lambda > 420\text{nm}$    | 10 vol% TEOA,<br>Water (90 mL)                                                      | 0.6585                             | [3]       |
| CdSe/CdS        | 10                        | 300 W Xe lamp<br>$\lambda \geq 400\text{nm}$ | 0.1 M<br>$\text{Na}_2\text{SO}_3/\text{Na}_2\text{S}$                               | 1.153                              | [4]       |

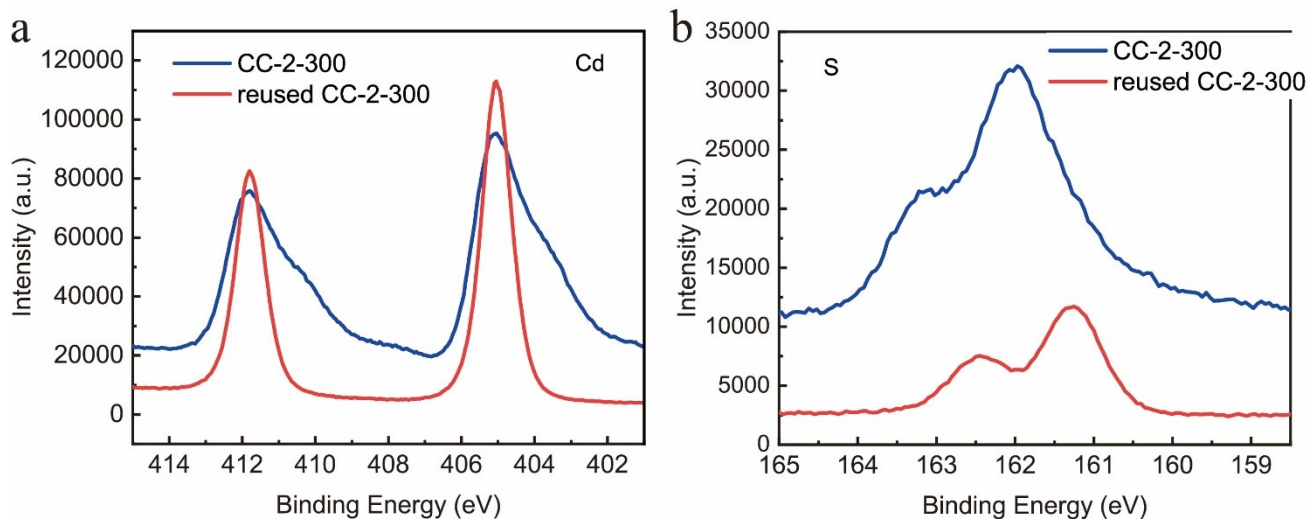

**Figure S2.** The XPS Cd3d and S2p spectra of recycled CC-N-300 after five runs.

### References

- [1] M. Yang, K. Wang, Z. Jin, Pyramidal CdS polyhedron modified with NiAl LDH to form S-scheme heterojunction for efficient photocatalytic hydrogen evolution, *ChemCatChem*, 13 (2021) 3525-3548.
- [2] Z. Sun, B. Lv, J. Li, M. Xiao, X. Wang, P. Du, Core-shell amorphous cobalt phosphide/cadmium sulfide semiconductor nanorods for exceptional photocatalytic hydrogen production under visible light, *J. Energy Chem. A*, 4 (2016) 1598-1602.
- [3] Y. Chen, F. Su, H. Xie, R. Wang, C. Ding, J. Huang, Y. Xu, L. Ye, One-step construction of S-scheme heterojunctions of N-doped MoS<sub>2</sub> and S-doped g-C<sub>3</sub>N<sub>4</sub> for enhanced photocatalytic hydrogen evolution, *Chem. Eng. J.*, 404 (2021) 126498-126507.
- [4] A. Thibert, F.A. Frame, E. Busby, M.A. Holmes, F.E. Osterloh, D.S. Larsen, Sequestering high-energy electrons to facilitate photocatalytic hydrogen generation in CdSe/CdS nanocrystals, *J. Phys. Chem. Lett.*, 2 (2011) 2688-2694.
